# Supplementary material for: Molecular Cloning and Functional Characterization of the Lycopene ε-Cyclase Gene via Virus-Induced Gene Silencing and Its Expression Pattern in Nicotiana tabacum
Source: MDPI journal article supplement (doi:10.3390/ijms150814766), 2014-08-22

## Supplementary File

Electropherogram of two fragments amplified in genomic DNA of *N. tabacum* using intron flanking (IF) primers labeled by FAM. One Peak corresponded to fragment of *Ntε-LCY1* (153bp) and the other corresponded to fragment of *Ntε-LCY2* (552 bp).

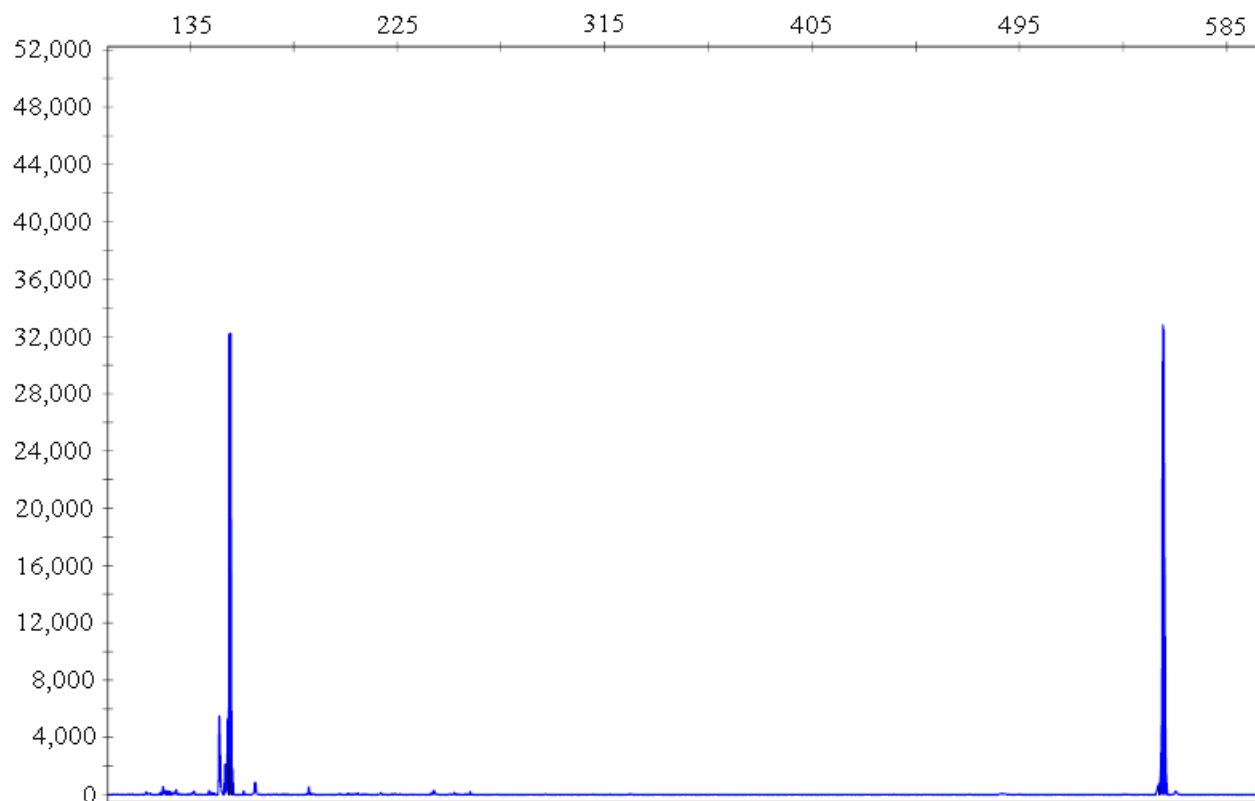

Supplement: s2 [file s2]
